# Supplementary material for: ASK1 inhibition reduces cell death and hepatic fibrosis in an Nlrp3 mutant liver injury model
Source: JCI journal article supplement (doi:10.1172/jci.insight.123294), 2020-01-29
Supplement: sd1 [file 1]

# **ASK1 Inhibition Reduces Cell Death and Hepatic Fibrosis in an *Nlrp3* Mutant Liver Injury Model**

Susanne Schuster-Gaul<sup>1,2</sup>, Lukas Jonathan Geisler<sup>1,5</sup>, Matthew D. McGeough<sup>1</sup>, Casey D. Johnson<sup>1</sup>, Anna Zagorska<sup>3</sup>, Li Li<sup>3</sup>, Alexander Wree<sup>1,6</sup>, Vivian Barry<sup>3</sup>, Igor Mikaelian<sup>3</sup>, Lily J. Jih<sup>4</sup>, Bettina G. Papouchado<sup>4</sup>, Grant Budas<sup>3</sup>, Hal M. Hoffman<sup>1</sup>, Ariel E. Feldstein<sup>1</sup>

<sup>1</sup>Department of Pediatrics, School of Medicine, UC San Diego, La Jolla, California, USA

<sup>2</sup>Clinic and Polyclinic for Cardiology, Medical Faculty, Leipzig University, Leipzig, Germany

<sup>3</sup>Gilead Sciences, Inc., Foster City, California, USA

<sup>4</sup>Department of Pathology, VA San Diego Healthcare System, San Diego, California, USA

<sup>5</sup>Department of Internal Medicine III, RWTH-Aachen University Hospital, Aachen, Germany

<sup>6</sup>Department of Hepatology and Gastroenterology, Charité University Medical Center Berlin, Berlin, Germany

## **Table of Content**

|                                |       |          |
|--------------------------------|-------|----------|
| <b>Supplementary Table S1</b>  | ..... | <b>2</b> |
| <b>Supplementary Table S2</b>  | ..... | <b>3</b> |
| <b>Supplementary Figure S1</b> | ..... | <b>4</b> |
| <b>Supplementary Figure S2</b> | ..... | <b>5</b> |

**Supplementary Table. Primer sequences used for quantitative PCR.**

| <b>Gene</b>   | <b>Primer</b> | <b>Sequence 5'-3'</b>          |
|---------------|---------------|--------------------------------|
| <i>Mpo</i>    | <i>FW</i>     | TTA AAA ACC TGG ATC GGA ACC AA |
|               | <i>RV</i>     | GCA TTA GCT TCA GAT TTA CGG GT |
| <i>Colla1</i> | <i>FW</i>     | GCT CCT CTT AGG GGC CAC T      |
|               | <i>RV</i>     | CCA CGT CTC ACC ATT GGG G      |
| <i>Colla2</i> | <i>FW</i>     | AAG GGT GCT ACT GGA CTC CC     |
|               | <i>RV</i>     | TTG TTA CCG GAT TCT CCT TTG G  |
| <i>Lum</i>    | <i>FW</i>     | CTC TTG CCT TGG CAT TAG TCG    |
|               | <i>RV</i>     | GGG GGC AGT TAC ATT CTG GTG    |
| <i>Emp1</i>   | <i>FW</i>     | TTG GTG CTA CTG GCT GGT CT     |
|               | <i>RV</i>     | CAT TGC CGT AGG ACA GGG AG     |
| <i>Acta2</i>  | <i>FW</i>     | GTC CCA GAC ATC AGG GAG TAA    |
|               | <i>RV</i>     | TCG GAT ACT TCA GCG TCA GGA    |
| <i>Timp1</i>  | <i>FW</i>     | CTT GGT TCC CTG GCG TAC TC     |
|               | <i>RV</i>     | ACC TGA TCC GTC CAC AAA CAG    |
| <i>Hprt</i>   | <i>FW</i>     | AGT CCC AGC GTC GTG ATT AG     |
|               | <i>RV</i>     | TTT CCA AAT CCT CGG CAT AAT GA |

## Supplementary Figure S1

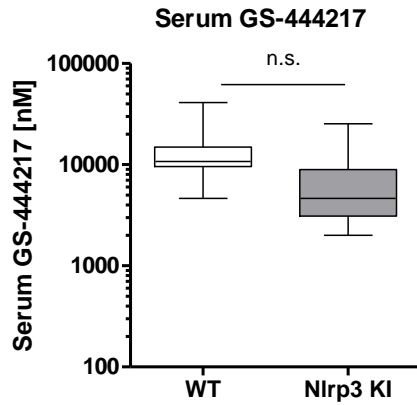

**Supplementary Figure S1. Serum concentration of GS-444217.** Serum concentration of GS-444217 [nM] were measured in fasted WT and *Nlrp3* KI mice by Mass spectrometry. Data show the median with Min to Max. (n.s not significant, unpaired two-tailed t-test).

## Supplementary Figure S2

### GO Biological processes downregulated by ASK1i

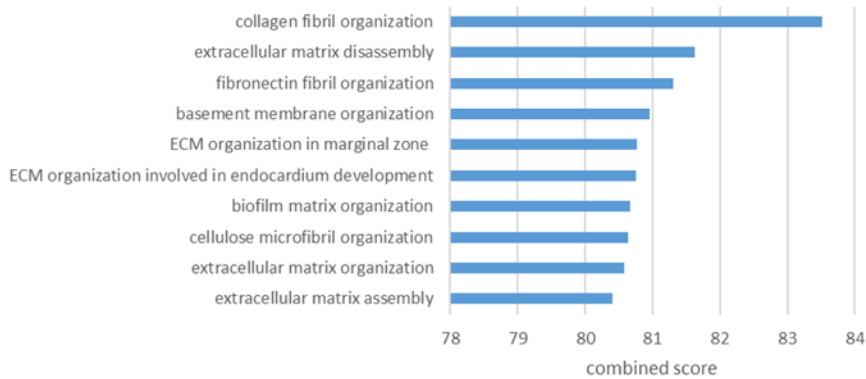

### GO Molecular function downregulated by ASK1i

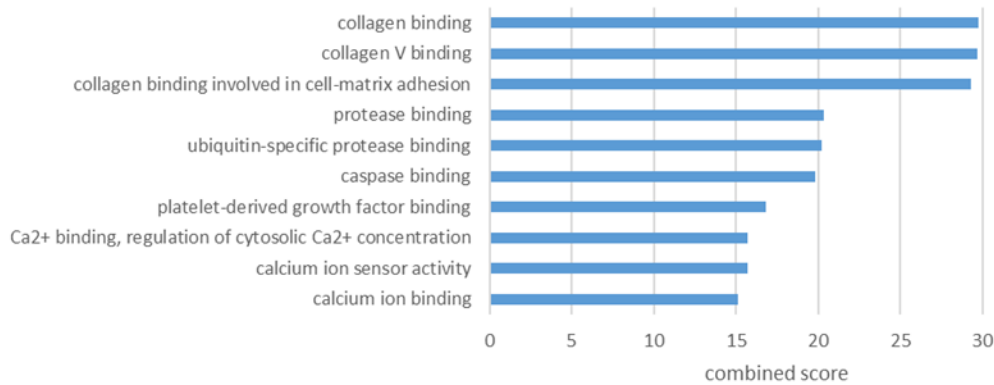

### GO Cellular compartment downregulated by ASK1i

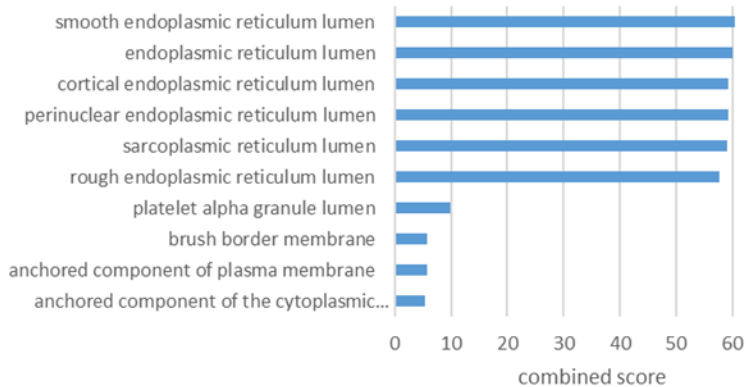

**Supplementary Figure S1. Enrichment analysis of Gene Ontology (GO) Biological processes, Molecular function and Cell compartment. Top 10 GO's ranked by combined**

score associated with down-modulated signatures using EnrichR analysis tool. Benjamini-Hochberg adjusted p-value  $< 0.05$  was used as significance threshold.
